# Supplementary material
Source: ML conference proceedings conference paper supplement (https://openreview.net/forum?id=KXDOmD7DM7)

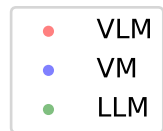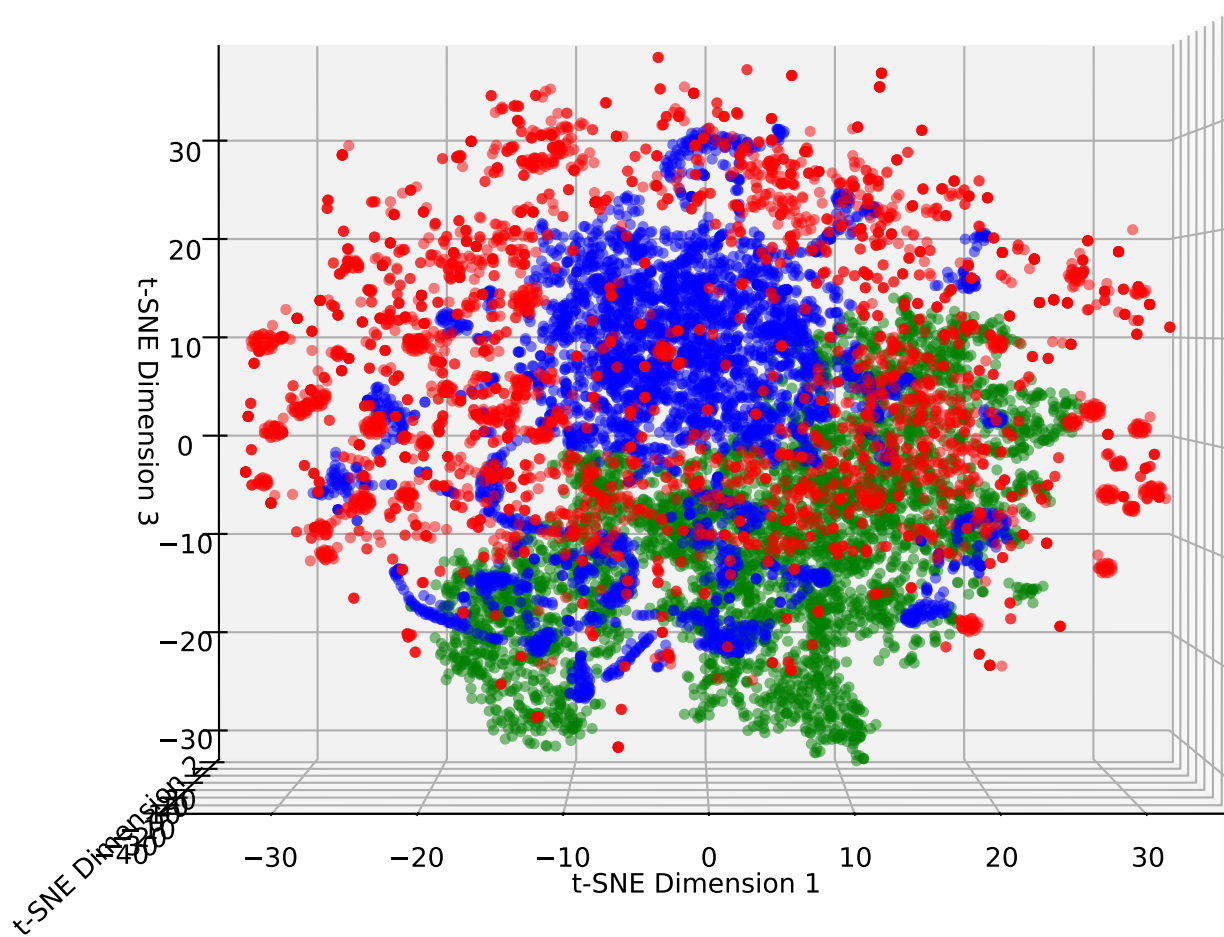

Supplement: supplementary_material [file attachment]

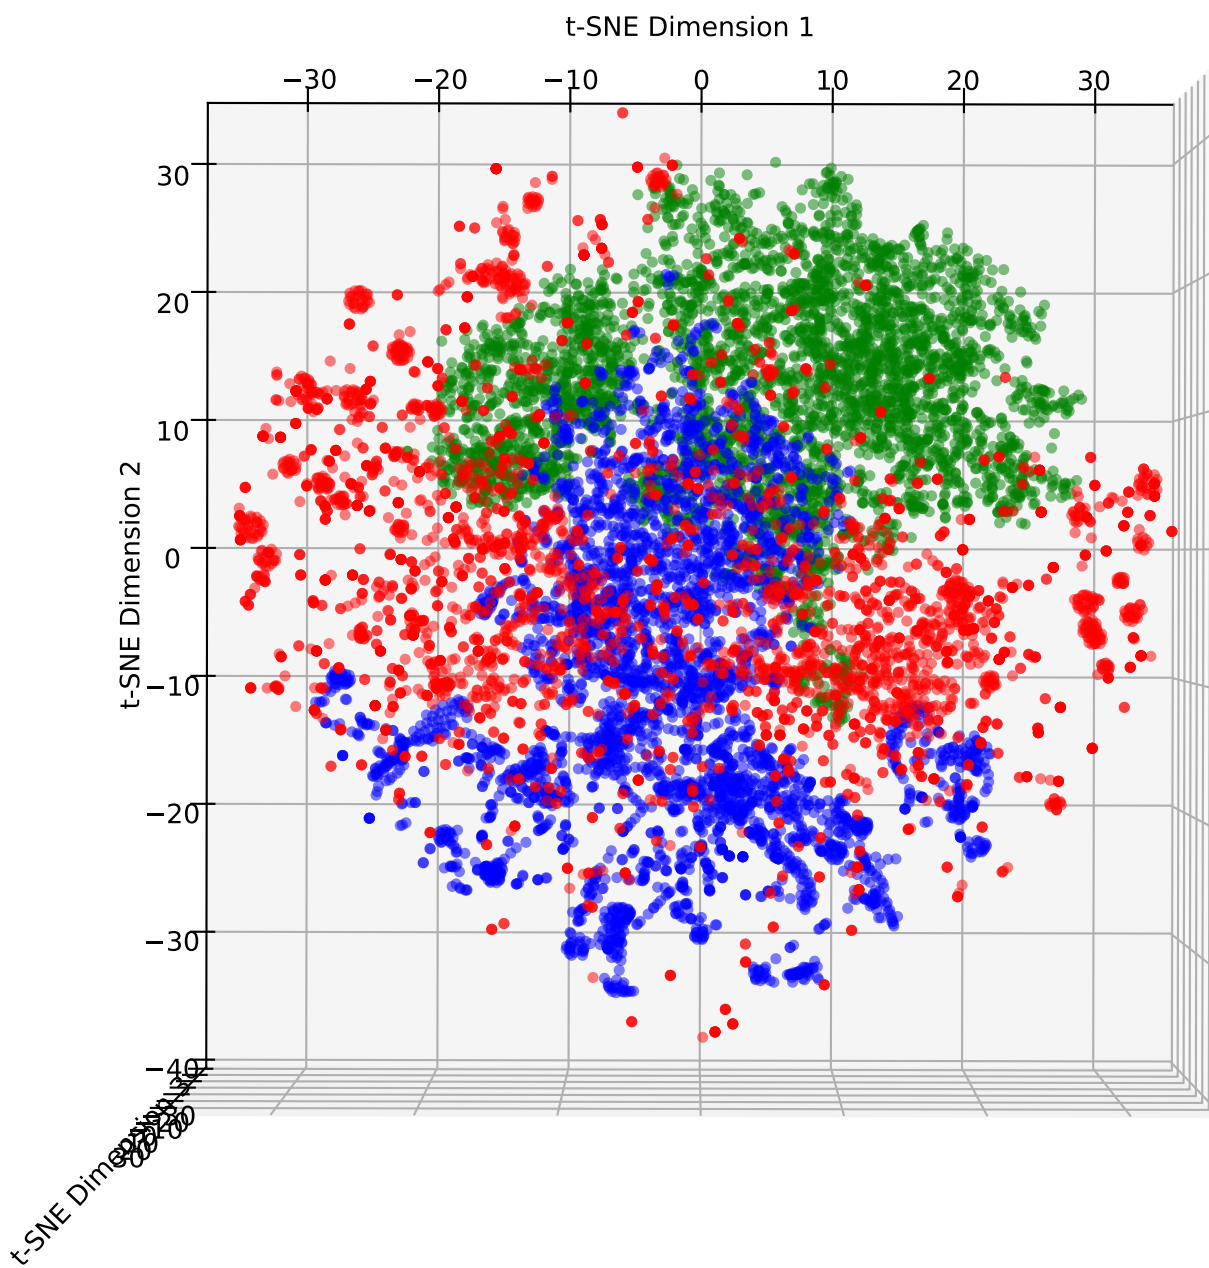

Supplement: supplementary_material [file attachment]

3D t-SNE Visualization of VLM, VM, and LLM

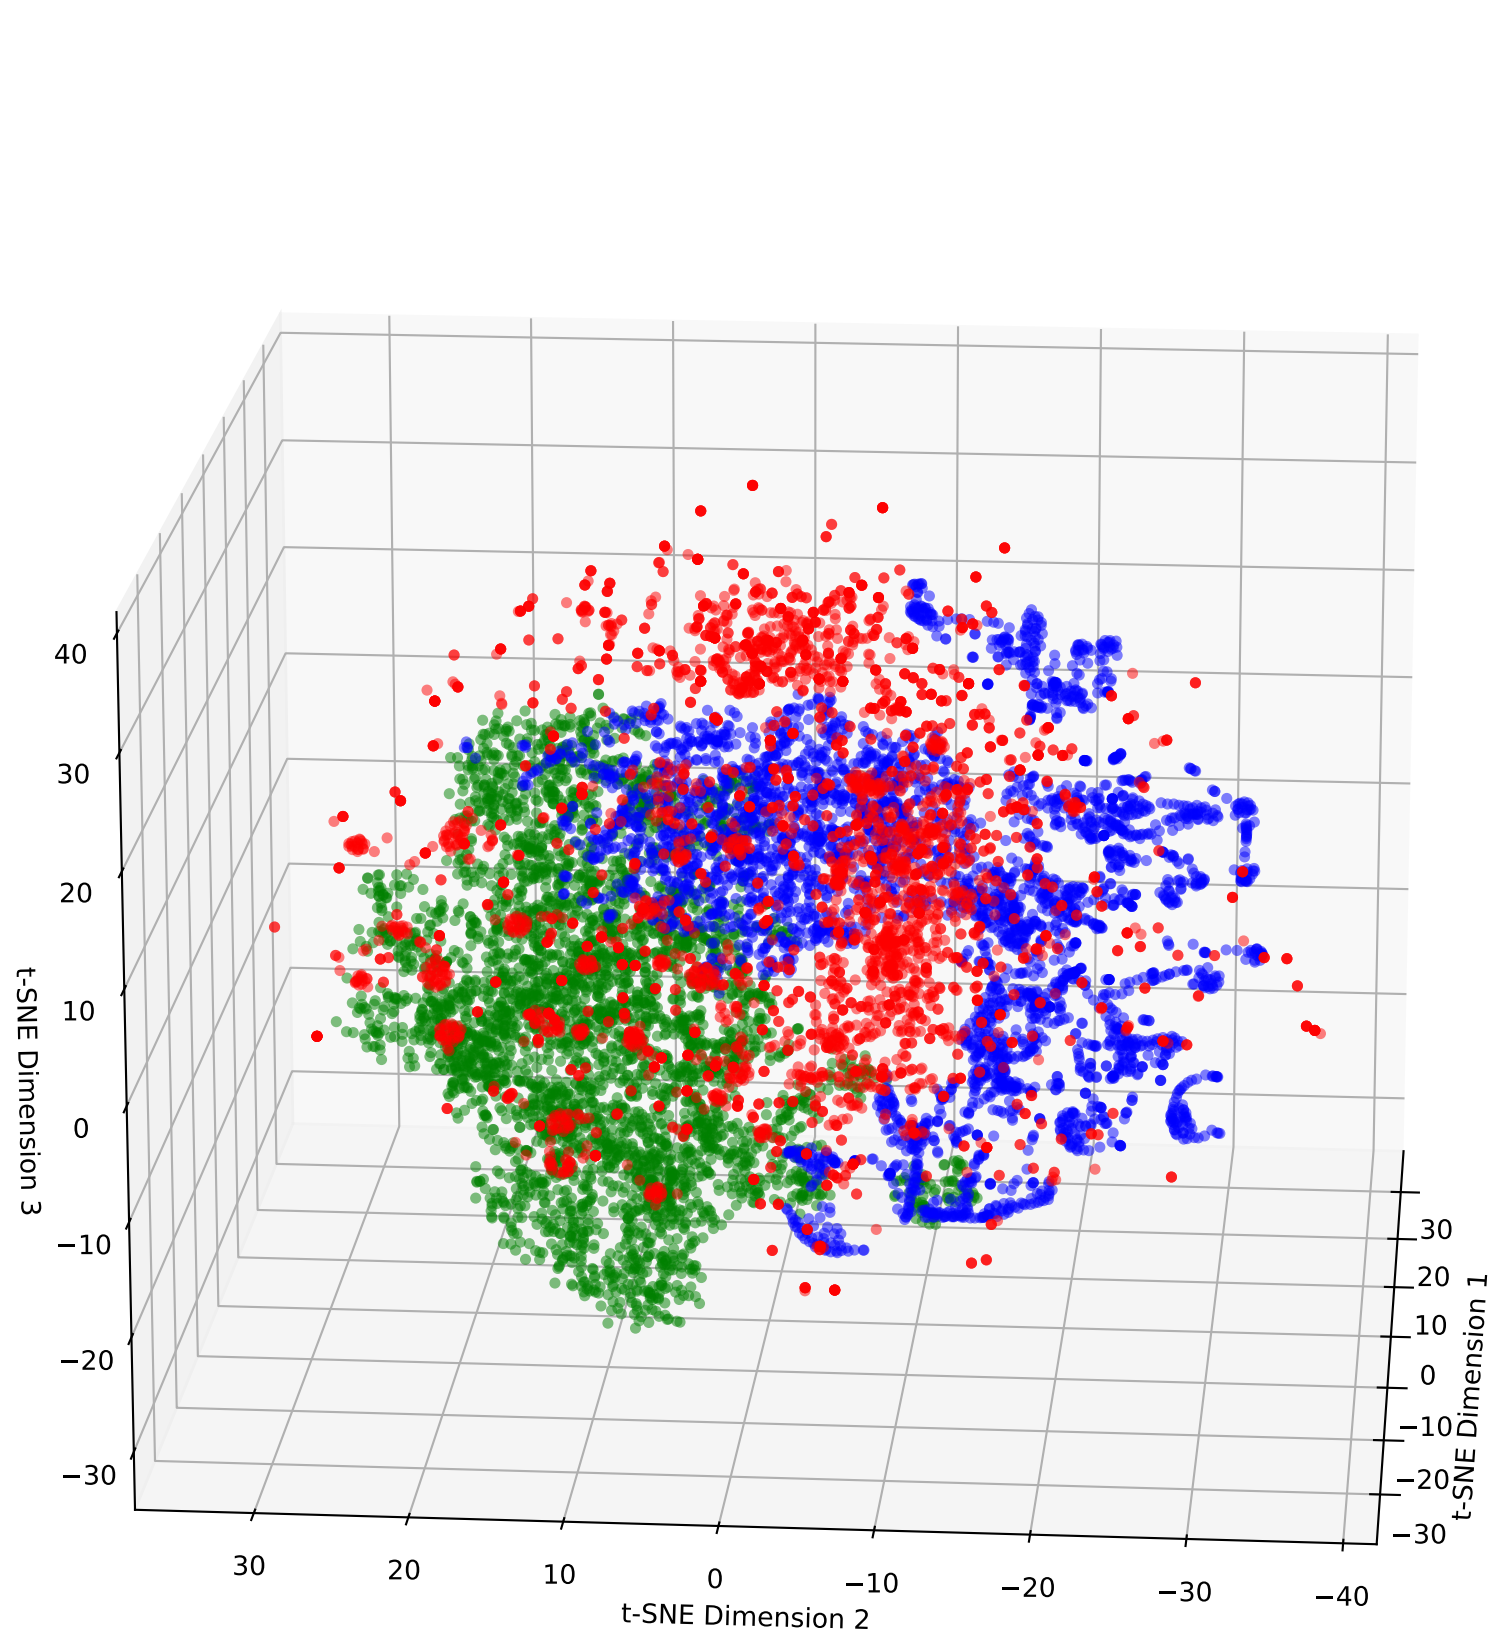

Supplement: supplementary_material [file attachment]
